# Supplementary material for: Emergence of a Novel Swine-Origin Influenza A (H1N1) Virus in Humans
Source: Atypon-hosted journal article supplement (doi:10.1056/nejmoa0903810), 2009-05-07
Supplement: nejm_dawood_2605sa1.pdf [file nejm_dawood_2605sa1.pdf]

## Supplementary Appendix

This appendix has been provided by the authors to give readers additional information about their work.

Supplement to: Novel Swine-Origin Influenza A (H1N1) Virus Investigation Team. Emergence of a novel swine-origin influenza A (H1N1) virus in humans. *N Engl J Med* 2009;360:2605-15. DOI: 10.1056/NEJMoa0903810.

(PDF updated May 22, 2009.)

## Supplement: Laboratory

Viral RNA was extracted from clarified supernatant fluid using the Qiagen BioRobot M48 workstation with the MagAttract Viral RNA M48 kit (Qiagen, Valencia, CA). For sequence determination, degenerate primers were designed based upon the alignment of all human A (H1N1) sequences available and used in RT-PCR reactions to generate a series of overlapping template amplicons for all genome segments. An M13 sequence tag was added to the 5' end of each primer to be used for later sequencing. Primer sequences are in **Supplementary Table 1**.

RT-PCR was performed using the AccessQuick RT-PCR Kit (Promega, WI). Amplicons were prepared for sequencing by incubating them at 37 °C for 15 min and then at 80 °C for 15 min with ExoSAP-it (USB Corporation, Cleveland, OH) to inactivate remaining dNTPs and primers. Each amplicon was sequenced from each end using M13 primers (F primer: TGTAACGACGGCCAGT; R primer: CAGGAAACAGCTATGACC). Sequencing reaction products were resolved on an Applied Biosystems 3730 ABI sequencer. Phylogenetic analyses were performed using the Genetic Algorithm for Rapid Likelihood Inference (GARLI 0.96b7), based on General Time Reversible (GTR) + I +  $\gamma$ 4 substitution model.<sup>3</sup> Results are shown in Supplementary figures 1-4.

Adamantane susceptibility was assessed by conventional sequencing and/or pyrosequencing assay<sup>4</sup> using viral RNA extracted from original clinical specimens and/or virus isolates. All samples tested contained the S31N mutation in the M2 protein which has been shown to confer cross-resistance to the adamantane class of anti-influenza drugs.

Nucleotide sequence analysis of both original clinical specimens and virus isolates revealed no predicted amino acid changes in NA previously shown to confer resistance to licensed NA inhibitors in the N1 NA subtype. Susceptibility of virus isolates to the NAIs oseltamivir and zanamivir was functionally assessed in the chemiluminescent neuraminidase inhibition assay using the NAStar™ Kit as previously described.<sup>5</sup> All virus isolates (n=37) exhibited IC<sub>50</sub> values (concentration needed to inhibit 50% of enzyme activity, nM) characteristic for the oseltamivir- and zanamivir-susceptible influenza viruses. Seasonal influenza A (H1N1) viruses were used as susceptible and resistant controls. The median IC<sub>50</sub> value for oseltamivir was 0.54 nM , while the median for zanamivir was 0.59 nM.

Swine Genome Primer Set

|             | 5'   | 3'                                                         | reverse 5' | 3'                                                            |
|-------------|------|------------------------------------------------------------|------------|---------------------------------------------------------------|
| <b>PB2</b>  |      |                                                            |            |                                                               |
| fragment 1  | 1    | tgt aaa acg acg gcc agt agc aaa agc agg tca att            | 538        | cag gaa aca aca gct atg acc ctt oca tra tta cat cgt gtg       |
| fragment 2  | 328  | tgt aaa acg acg gcc agt gtr aca tgg tgg aay aga a          | 816        | cag gaa aca gct atg acc gct ttg ttc aay atc rtc att           |
| fragment 3  | 487  | tgt aaa acg acg gcc agt cct ggt cay gca gac ctc ag         | 1019       | cag gaa aca gct atg acc cca aar ctg aag gar ctg at            |
| fragment 4  | 713  | tgt aaa acg acg gcc agt caa gca gtr ttt aca ttg aag t      | 1289       | cag gaa aca gct atg acc cta act gct ttt ayc atg caa t         |
| fragment 5  | 946  | tgt aaa acg acg gcc agt ccr acw gaa gaa caa gct gt         | 1509       | cag gaa aca gct atg acc gga tta ttc atc yac acc cat           |
| fragment 6  | 1169 | tgt aaa acg acg gcc agt aac caa gra gat tgr ttc a          | 1740       | cag gaa aca gct atg acc ctg aga cca ytg aat ttt rac a         |
| fragment 7  | 1447 | tgt aaa acg acg gcc agt cca agy acm gag atg tca atg aga    | 2186       | cag gaa aca gct atg acc ttr ctc art tca ttg atg ct            |
| fragment 8  | 1683 | tgt aaa acg acg gcc agt caa tac cta yca ttg gat cat cag aa | 2341       | cag gaa aca gct atg acc tag tag aaa caa ggt cgt t             |
| <b>PB1</b>  |      |                                                            |            |                                                               |
| fragment 1  | 22   | tgt aaa acg acg gcc agt agc aaa agc agg tca att            | 477        | cag gaa gct atg acc ctr aaw act tct atr gtg tt                |
| fragment 2  | 233  | tgt aaa acg acg gcc agt caa ctc aac cor atg ggr oca ct     | 843        | cag gaa aca gct atg acc gtt oca gct ttt crc awa tg            |
| fragment 3  | 389  | tgt aaa acg acg gcc agt aca agr tag cac aaa tra c          | 1041       | cag gaa aca gct atg acc ctt aac cay tea ggy tga ttt           |
| fragment 4  | 711  | tgt aaa acg acg gcc agt tga aca cra tga oca arg a          | 1278       | cag gaa aca gct atg acc ttg aac atg ccc atc atc aty cca gg    |
| fragment 5  | 974  | tgt aaa acg acg gcc agt aat caa aay cct mga atg tt         | 1666       | cag gaa aca gct atg acc agc tcc atg ctr aaa ttr gc            |
| fragment 6  | 1139 | tgt aaa acg acg gcc agt caa ata ccy gca gar atg cta gc     | 1659       | cag gaa aca gct atg acc oca agr tca ttg ttt atc at            |
| fragment 7  | 1489 | tgt aaa acg acg gcc agt atg agy aaa aag aag tcy ta         | 1854       | cag gaa aca gct atg acc tca aty tcy tta tgg gtg ac            |
| fragment 8  | 1632 | tgt aaa acg acg gcc agt gcy aat tty agc atg gag ct         | 2321       | cag gaa aca gct atg acc aga aac aag gca ttt                   |
| <b>PA</b>   |      |                                                            |            |                                                               |
| fragment 1  | 0    | tgt aaa acg acg gcc agt agc aaa agc agg tac tga t          | 493        | cag gaa aca gct atg acc tar tck gcc ttt gtg gcc att tc        |
| fragment 2  | 235  | tgt aaa acg gcc agt oca aat gca ctk tta aar cac aga tt     | 756        | cag gaa aca gct atg acc tga aac agc ttg ccc tea atg           |
| fragment 3  | 361  | tgt aaa acg acg gcc agt tat gat tac aar gag aa             | 989        | cag gaa aca gct atg acc tct ttc cat cca aag aat gtt           |
| fragment 4  | 702  | tgt aaa acg acg gcc agt tgc mtt gar aat ttt agr acc ta     | 1292       | cag gaa aca gct atg acc tcr oak gcc ttg ttg aac tca tt        |
| fragment 5  | 894  | tgt aaa acg acg gcc agt aaa ttr agc att gar gay oca        | 1662       | cag gaa aca gct atg acc taw agt ctg ggg tca gtg ag            |
| fragment 6  | 1204 | tgt aaa acg acg gcc agt taa gcg att tra agc aat atg a      | 2037       | cag gaa aca gct atg acc aay ccy tcy aat tgt ggw gat g         |
| fragment 7  | 1444 | tgt aaa acg acg gcc agt aat gca tcc tgt gca gca atg ga     | 2057       | cag gaa aca gct atg acc ttg tcc cta aga gcc tga aca a         |
| fragment 8  | 1787 | tgt aaa acg acg gcc agt aar tgg gga atg gag atg ag         | 2233       | cag gaa aca gct atg acc agt aga aac aag gta cct ttt           |
| <b>HA</b>   |      |                                                            |            |                                                               |
| fragment 1  | 1    | tgt aaa acg acg gcc agt ata cga ata gca aaa gca ggg g      | 461        | cag gaa aca gct atg acc tca tga ttg ggc cay ga                |
| fragment 2  | 351  | tgt aaa acg acg gcc agt acg tgc tac ccw ggr gat ttc a      | 943        | cag gaa aca gct atg acc gaa akx gga grc tgg tgt tta           |
| fragment 3  | 379  | tgt aaa acg acg gcc agt arg arc tra gag agc a              | 1204       | cag gaa aca gct atg acc caa tgg ort tyt gtg tgc tc            |
| fragment 4  | 736  | tgt aaa acg acg gcc agt agr atg rac tat tac tgg ac         | 1340       | cag gaa aca gct atg acc ttc tko att rta wgt cca aa            |
| fragment 5  | 1124 | tgt aaa acg acg gcc agt tgg atg gta ygg tta yca yca        | 1541       | cag gaa aca gct atg acc tca taa gty cca ttt ytg a             |
| fragment 6  | 1204 | tgt aaa acg acg gcc agt aag atg aay acr car ttc aca g      | 1778       | cag gaa aca gct atg acc gty tca gta aca agg gtg ttt           |
| <b>NP</b>   |      |                                                            |            |                                                               |
| fragment 1  | 1    | tgt aaa acg acg gcc agt cag ggt agc taa tca ctc ac         | 553        | cag gaa aca gct atg acc aga gca cat yct ggg atc cat           |
| fragment 2  | 296  | tgt aaa acg acg gcc agt atg gtr ctc tct gct ttt gat ga     | 757        | cag gaa aca gct atg acc ttt gtg cag ctg ttt gaa att tyc ott t |
| fragment 3  | 513  | tgt aaa acg acg gcc agt tgg cat tch aat ttr aat gat        | 1042       | cag gaa aca gct atg acc ctg ret ctt gtg tgc dgg               |
| fragment 4  | 619  | tgt aaa acg acg gcc agt gct gca gtc aar gga rt             | 1177       | cag gaa aca gct atg acc aag cra ttt gta ctc tag t             |
| fragment 5  | 925  | tgt aaa acg acg gcc agt cct gcy tgt gyt taw gga c          | 1565       | cag gaa aca gct atg acc agt aga aac aag ggt att ttt c         |
| <b>NA</b>   |      |                                                            |            |                                                               |
| fragment 1  | 0    | tgt aaa acg acg gcc agt agc aaa agc agg agt                | 600        | cag gaa aca gct atg acc ctg gac org aaa ttc c                 |
| fragment 2  | 318  | tgt aaa acg acg gcc agt tac aca aac gac aay agc            | 740        | cag gaa aca gct atg acc ggr oca tgg gtc att atg               |
| fragment 3  | 536  | tgt aaa acg acg gcc agt ggt cag caa gcg cat gyc atg a      | 1063       | cag gaa aca gct atg acc cat aty tgt atg aaa acc               |
| fragment 4  | 726  | tgt aaa acg acg gcc agt aat ggr car gcc tcr tac aa         | 1346       | cag gaa aca gct atg acc gct gct ycc rct agt oca gat           |
| fragment 5  | 941  | tgt aaa acg acg gcc agt tag gat aca tct gca gtg g          | 1452       | cag gaa aca gct atg acc agt aga aac aag gag                   |
| <b>M</b>    |      |                                                            |            |                                                               |
| fragment 1  | 0    | tgt aaa acg acg gcc agt agc aaa agc agg tag                | 473        | cag gaa aca gct atg acc gca atc tgy tca cak gt                |
| fragment 2  | 223  | tgt aaa acg acg gcc agt cac cgt gcc cag tga gcg            | 750        | cag gaa aca gct atg acc tca ytl gaa ycg ytg cat               |
| fragment 3  | 383  | tgt aaa acg acg gcc agt tct gct ggw gca ctt gcc agt tg     | 1027       | cag gaa aca gct atg acc agt agm aac aag gta gt                |
| <b>NS</b>   |      |                                                            |            |                                                               |
| fragment 1  | 24   | tgt aaa acg acg gcc agt agc aaa agc agg gtr aca aag aca    | 482        | cag gaa aca gct atg acc tgg gtg aaa gcc ctt a                 |
| fragment 2  | 250  | tgt aaa acg acg gcc agt tga ggc wyl taa aat gac ca         | 890        | cag gaa aca gct atg acc agt aga aac aag ggt ttt tat           |
| fragment 3  | 418  | tgt aaa acg acg gcc agt aaa gcd aay ttc agt gtg            | 742        | cag gaa aca gct atg acc ttc aat hag oca tct ta                |
| m13 forward |      | tgt aaa acg acg gcc agt                                    |            |                                                               |
| m13 reverse |      | cag gaa aca gct atg acc                                    |            |                                                               |



**Supplementary Figure 1.  
Phylogenetic Tree  
of the Hemagglutinin (HA)  
Gene Segment of  
Influenza A (H1) Viruses**

H1N1 Outbreak  
Highest NT Identity by Blast  
Human cases of swine H1  
Seasonal H1

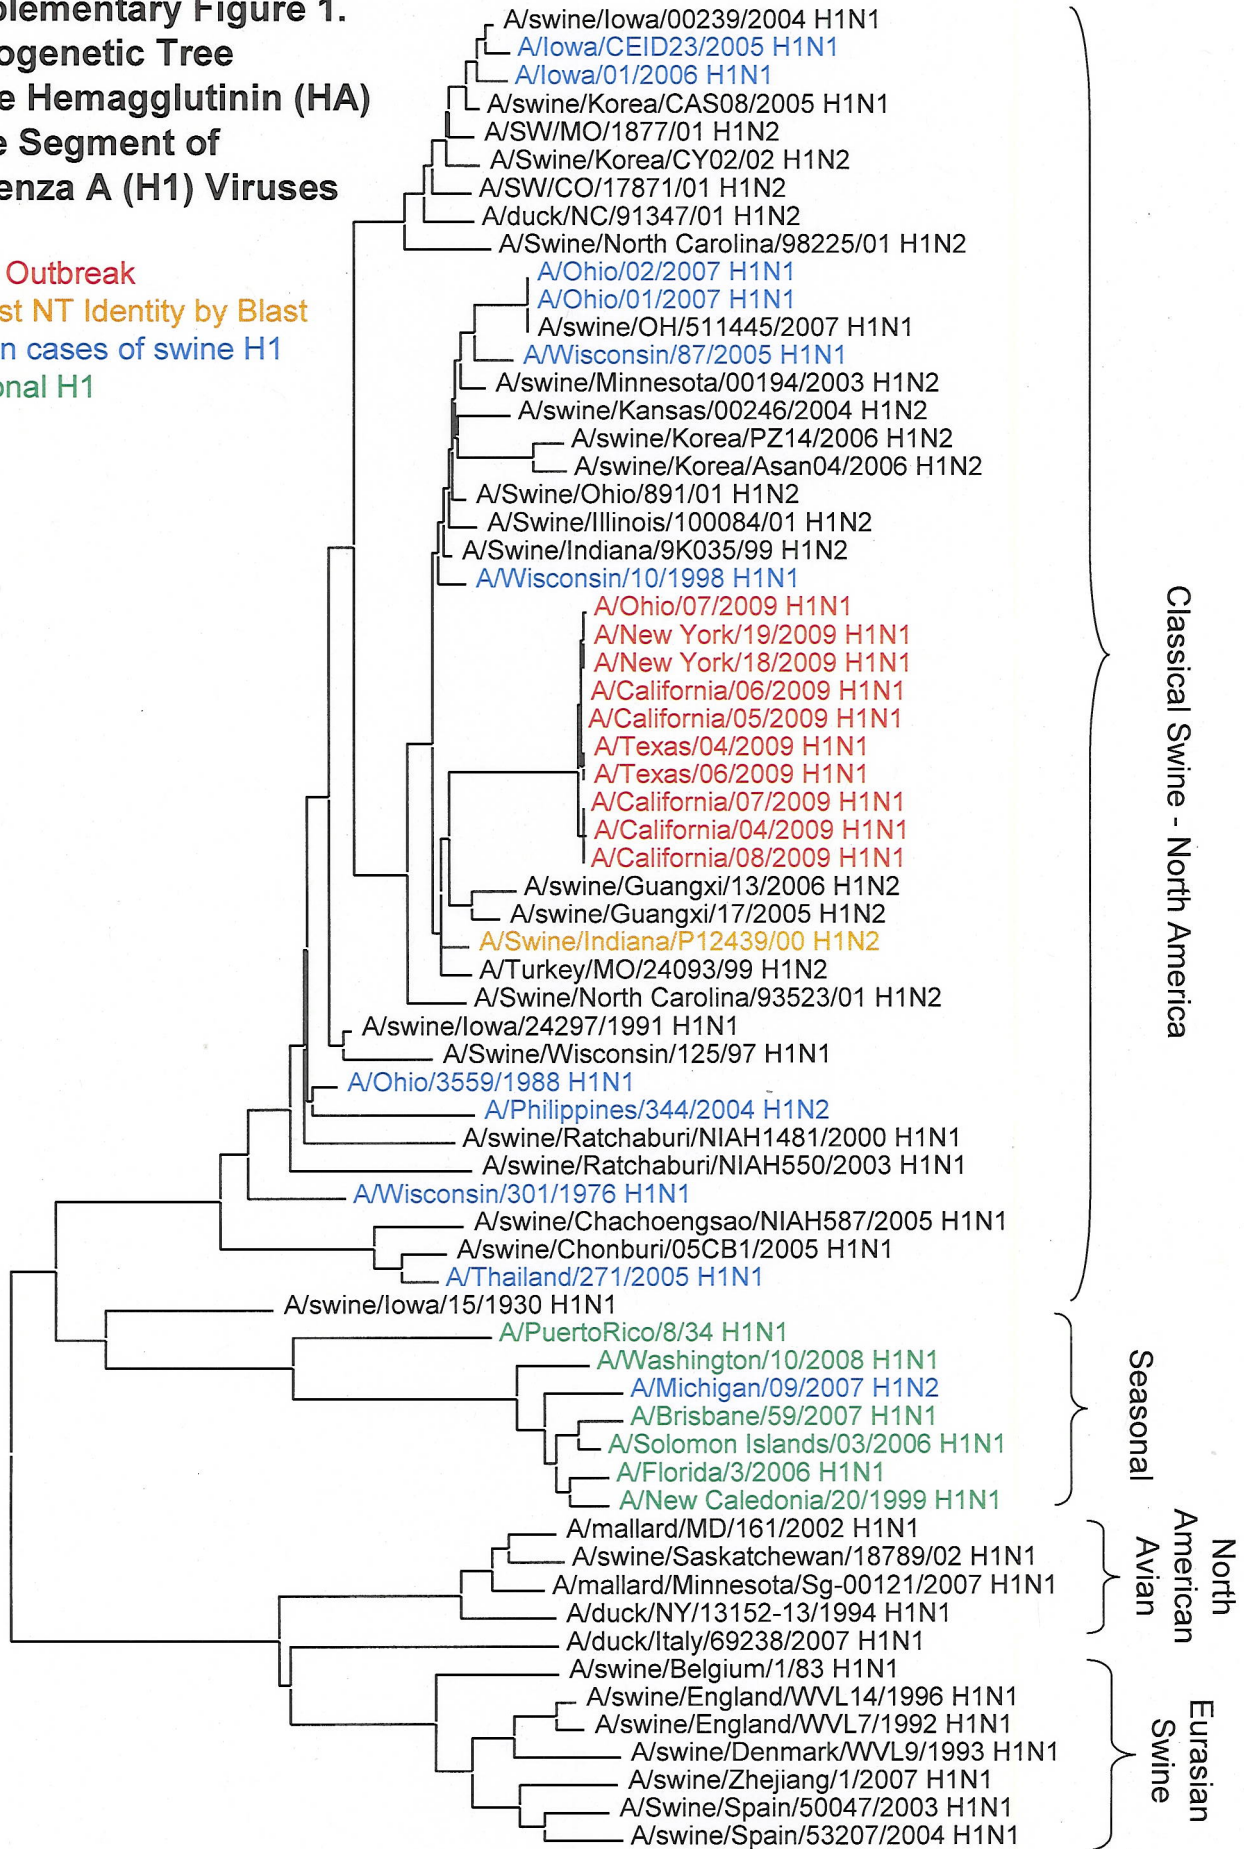

**Supplementary Figure 2.**  
**Phylogenetic Tree**  
**of the Neuraminidase (NA)**  
**Gene Segment of**  
**Influenza A (N1) Viruses**

H1N1 Outbreak

Highest NT Identity by Blast

Human cases of H1 swine

Seasonal H1

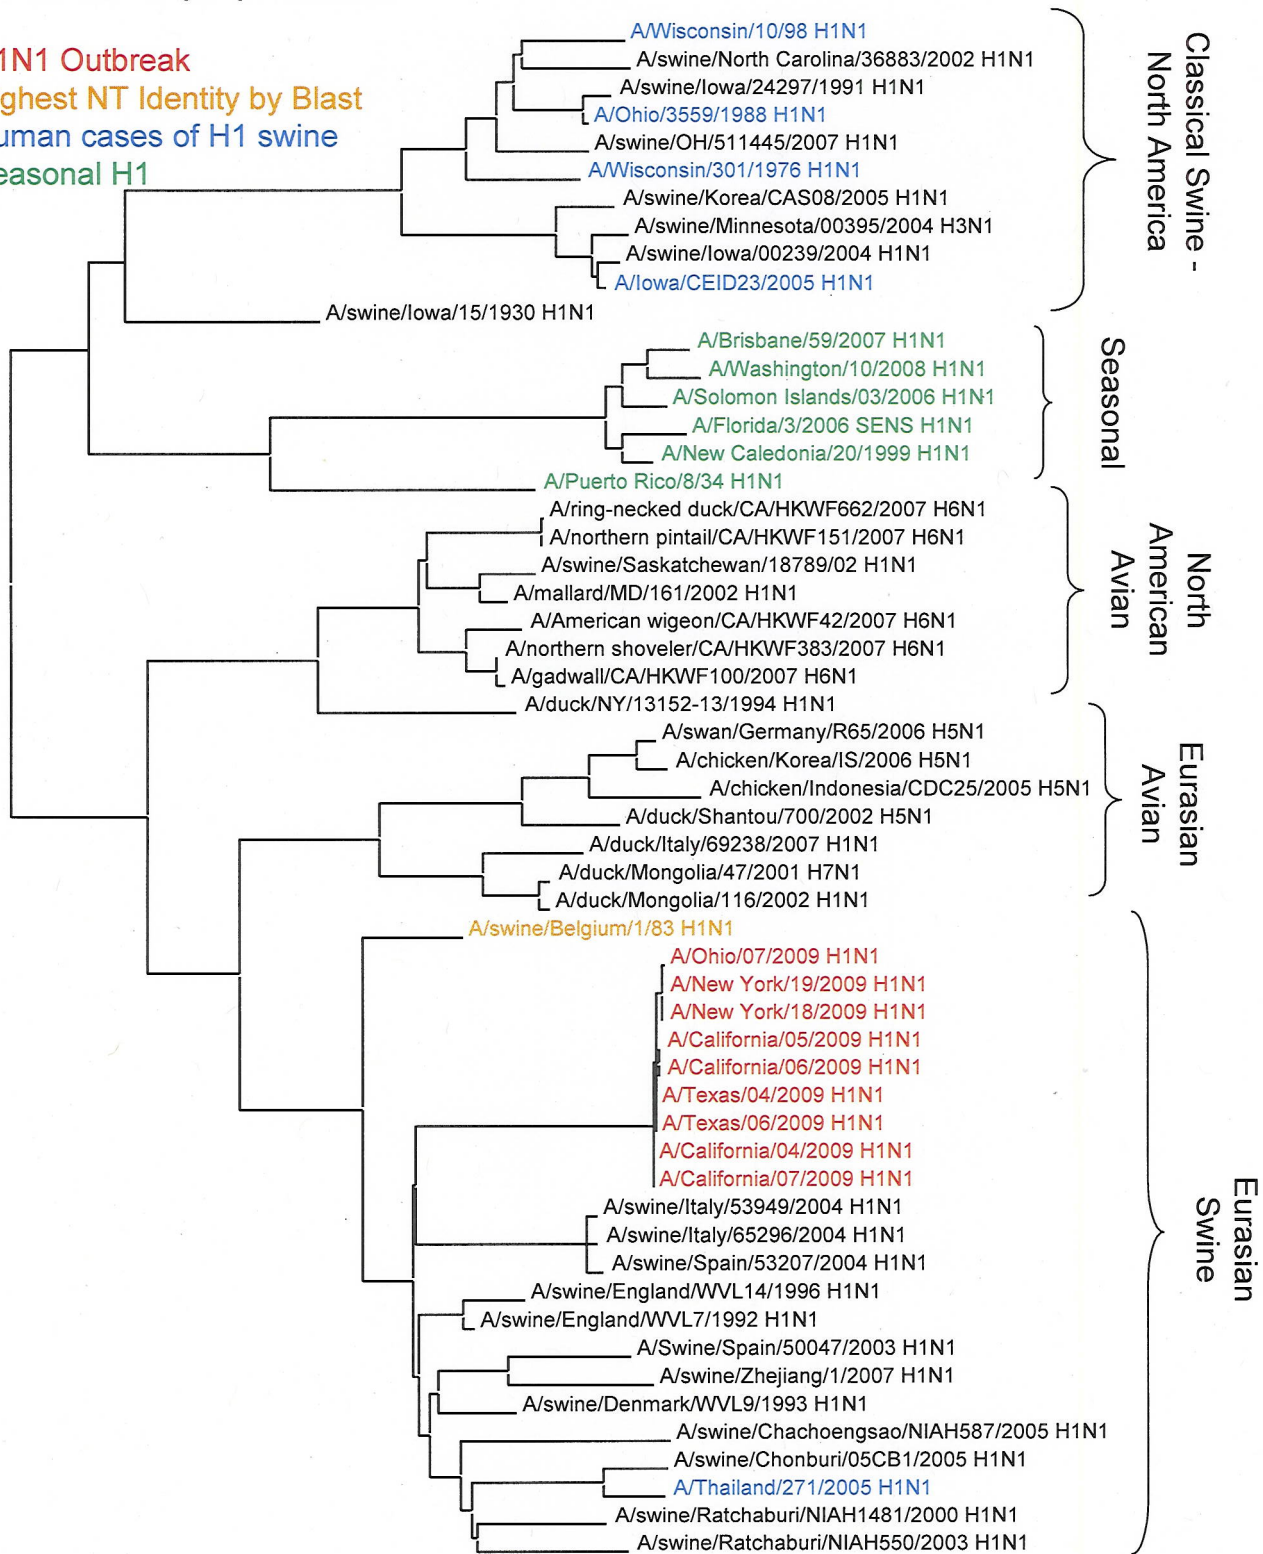

0.02



**Supplementary Figure 3.  
Phylogenetic Tree  
of the Matrix (M)  
Gene Segment of  
Influenza A Viruses**

H1N1 Outbreak  
Highest NT Identity by Blast  
Human cases of H1 swine  
Seasonal H1

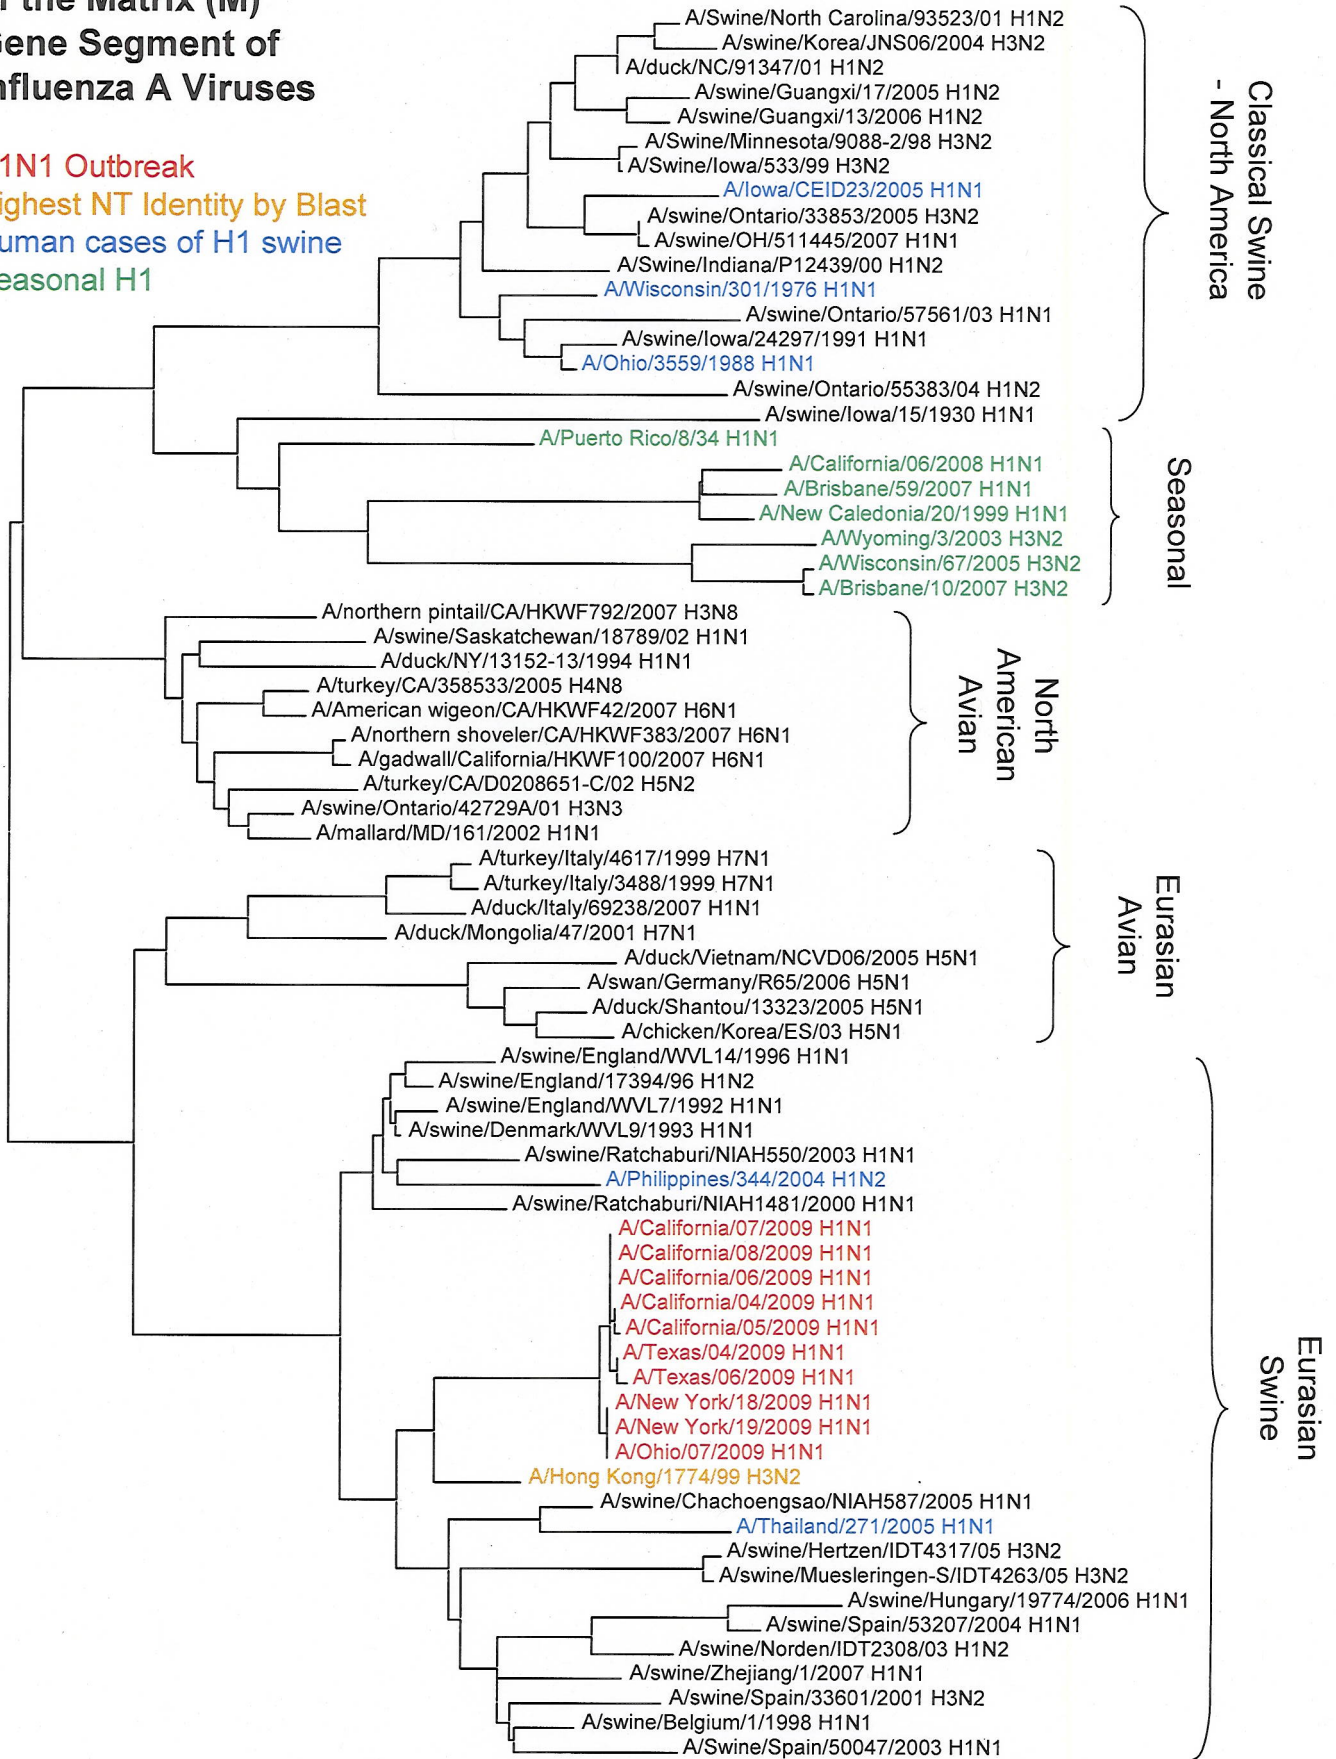

Accession Numbers For Strains Included In Supplemental Figure 2:

|                      | HA       | NA       | M        |
|----------------------|----------|----------|----------|
| A/CALIFORNIA/04/2009 | FJ966082 | FJ966084 | FJ966085 |
| A/CALIFORNIA/05/2009 | FJ966952 | FJ966956 | FJ966954 |
| A/CALIFORNIA/06/2009 | FJ966960 | FJ971075 | FJ966962 |
| A/CALIFORNIA/07/2009 | FJ969540 | FJ984386 | FJ969537 |
| A/CALIFORNIA/08/2009 | FJ971076 |          | FJ969532 |
| A/NEW YORK/18/2009   | FJ984355 | FJ984350 | FJ984348 |
| A/NEW YORK/19/2009   | FJ984394 | FJ984390 | FJ984388 |
| A/OHIO/07/2009       | FJ984397 | FJ969520 | FJ984395 |
| A/TEXAS/04/2009      | FJ981612 | FJ966981 | FJ966980 |
| A/TEXAS/06/2009      | FJ984385 | FJ984383 | FJ984381 |
